# Supplementary material for: RNA-Seq analysis of ileocecal valve and peripheral blood from Holstein cattle infected with Mycobacterium avium subsp. paratuberculosis revealed dysregulation of the CXCL8/IL8 signaling pathway
Source: PubMed Central journal article supplement (PMC6795908; doi:10.1038/s41598-019-51328-0), 2019-10-16

**RNA-Seq analysis of ileocecal valve and peripheral blood from Holstein cattle infected with *Mycobacterium avium* subsp. *paratuberculosis* revealed dysregulation of the CXCL8/IL8 signaling pathway**

Marta Alonso-Hearn <sup>1\*</sup>, Maria Canive <sup>1</sup>, Cristina Blanco-Vazquez <sup>2</sup>, Rosana Torremocha <sup>3</sup>, Ana Balseiro <sup>2</sup>, Javier Amado <sup>4</sup>, Endika Varela-Martinez <sup>5</sup>, Ricardo Ramos <sup>3</sup>, Begoña M. Jugo <sup>5</sup> and Rosa Casais <sup>2</sup>

**1** NEIKER-Instituto Vasco de Investigación y Desarrollo Agrario, Animal Health Department, Derio, Bizkaia, Spain,

**2** SERIDA, Servicio Regional de Investigación y Desarrollo Agroalimentario, Centro de Biotecnología Animal, Deva, Asturias, Spain,

**3** Scientific Park of Madrid, Genomic Unit, Campus de Cantoblanco, Madrid, Spain,

**4** LSAPA, Animal Health Laboratory of the Principality of Asturias, Department of Microbiology, Gijón, Asturias, Spain

**5** University of the Basque Country (UPV-EHU), Department of Genetics, Physical Anthropology and Animal Physiology, Faculty of Science and Technology, Bilbao

**Supplementary Table 1. Biological samples and experimental replicates RNA Seq data.**

| Cow ID | Replicate | Sample | Total number of reads | Reds after trimming | Reads after mapping | Mapped reads (%) | Multiple alignments | Multiple alignments (%) |
|--------|-----------|--------|-----------------------|---------------------|---------------------|------------------|---------------------|-------------------------|
| 1      | –         | PB     | 25378997              | 25321021            | 23442982            | 92.6             | 1013576             | 4.0                     |
| 1      | –         | ICV    | 22485395              | 22448313            | 20778436            | 92.6             | 960728              | 4.3                     |
| 2      | 1         | PB     | 27430862              | 26221879            | 24731206            | 94.3             | 1348272             | 5.5                     |
| 2      | 2         | PB     | 25423706              | 24274388            | 22928902            | 94.5             | 1175411             | 5.1                     |
| 2      | 1         | ICV    | 21955291              | 20865686            | 19323967            | 92.6             | 789040              | 4.1                     |
| 2      | 2         | ICV    | 20328572              | 19424275            | 18014936            | 92.7             | 883206              | 4.9                     |
| 3      | –         | PB     | 26328834              | 26269342            | 24364551            | 92.8             | 1323677             | 5.0                     |
| 3      | –         | ICV    | 22553960              | 22509141            | 20747321            | 92.2             | 1048927             | 4.7                     |
| 4      | –         | PB     | 22298387              | 22246905            | 20498481            | 92.1             | 873110              | 3.9                     |
| 4      | –         | ICV    | 21880358              | 21833012            | 20326901            | 93.1             | 965338              | 5.2                     |
| 5      | –         | PB     | 26322126              | 26257852            | 23915158            | 91.1             | 965338              | 5.7                     |
| 5      | –         | ICV    | 23278256              | 23231904            | 21264647            | 91.5             | 1096951             | 4.7                     |
| 6      | 1         | PB     | 20051147              | 17459925            | 16706238            | 95.7             | 1033345             | 6.2                     |
| 6      | 2         | PB     | 20309821              | 17681238            | 16935538            | 95.8             | 1097540             | 6.5                     |
| 6      | 1         | ICV    | 18754089              | 17915042            | 16608514            | 92.7             | 815870              | 4.9                     |
| 6      | 2         | ICV    | 20982964              | 20028587            | 18542443            | 92.6             | 1196745             | 6.5                     |
| 7      | –         | PB     | 24093748              | 24039957            | 22311230            | 92.8             | 830200              | 3.5                     |
| 7      | –         | ICV    | 20544146              | 20515344            | 18971171            | 92.5             | 927826              | 4.5                     |
| 8      | 1         | PB     | 20329228              | 17660831            | 16867545            | 95.5             | 770714              | 4.6                     |
| 8      | 2         | PB     | 21073654              | 18326128            | 17481457            | 95.4             | 762102              | 4.4                     |
| 8      | 1         | ICV    | 20096314              | 19197461            | 18004883            | 93.8             | 751745              | 4.2                     |
| 8      | 2         | ICV    | 23087897              | 21995135            | 20627314            | 93.8             | 829144              | 4.0                     |
| 9      | –         | PB     | 15868370              | 15831194            | 14637126            | 92.5             | 810996              | 5.1                     |
| 9      | –         | ICV    | 21946355              | 21902385            | 20028060            | 91.4             | 1008152             | 4.6                     |
| 10     | –         | PB     | 23181092              | 22173624            | 20866802            | 94.1             | 1217332             | 5.8                     |
| 10     | –         | ICV    | 17870903              | 17147527            | 15779357            | 92.0             | 816491              | 5.2                     |
| 11     | 1         | PB     | 29153476              | 27883749            | 26522168            | 95.1             | 1227177             | 4.6                     |
| 11     | 2         | PB     | 24411524              | 23359067            | 22248361            | 95.2             | 955078              | 4.3                     |
| 11     | 1         | ICV    | 17831469              | 17102361            | 15725642            | 92.0             | 806102              | 5.1                     |
| 11     | 2         | ICV    | 26194068              | 25092879            | 23191445            | 92.4             | 1253006             | 5.4                     |
| 12     | 1         | PB     | 19426072              | 16928040            | 16147240            | 95.4             | 1101792             | 6.8                     |
| 12     | 2         | PB     | 21180755              | 18462166            | 17604588            | 95.4             | 1177815             | 6.7                     |
| 12     | 1         | ICV    | 26198482              | 25071815            | 23346127            | 93.1             | 1286444             | 5.5                     |
| 12     | 2         | ICV    | 24072525              | 23043123            | 21436647            | 93.0             | 1245385             | 5.8                     |
| 13     | –         | PB     | 19591604              | 19543700            | 17648053            | 90.3             | 993927              | 5.1                     |
| 13     | –         | ICV    | 18725483              | 18661911            | 16790989            | 90.0             | 965338              | 5.2                     |
| 14     | –         | PB     | 22205068              | 22154209            | 20330845            | 91.8             | 965338              | 5.2                     |
| 14     | –         | ICV    | 25017698              | 24974498            | 22905236            | 91.7             | 1239203             | 5.0                     |
| Mean   |           |        | 22312176              | 21448832            | 19963224            | 93.1             | 1013904.8           | 5.0                     |

PB: Peripheral blood; ICV: Ileocecal valve

**Supplementary figure 1. Volcano plots showing the DE genes ( $\log_2$  fold change versus  $-\log$  (p value) for each sample and correspondent replica. The absence of red spots in the plots indicated the lack of DE genes between each sample and corresponding replica.**

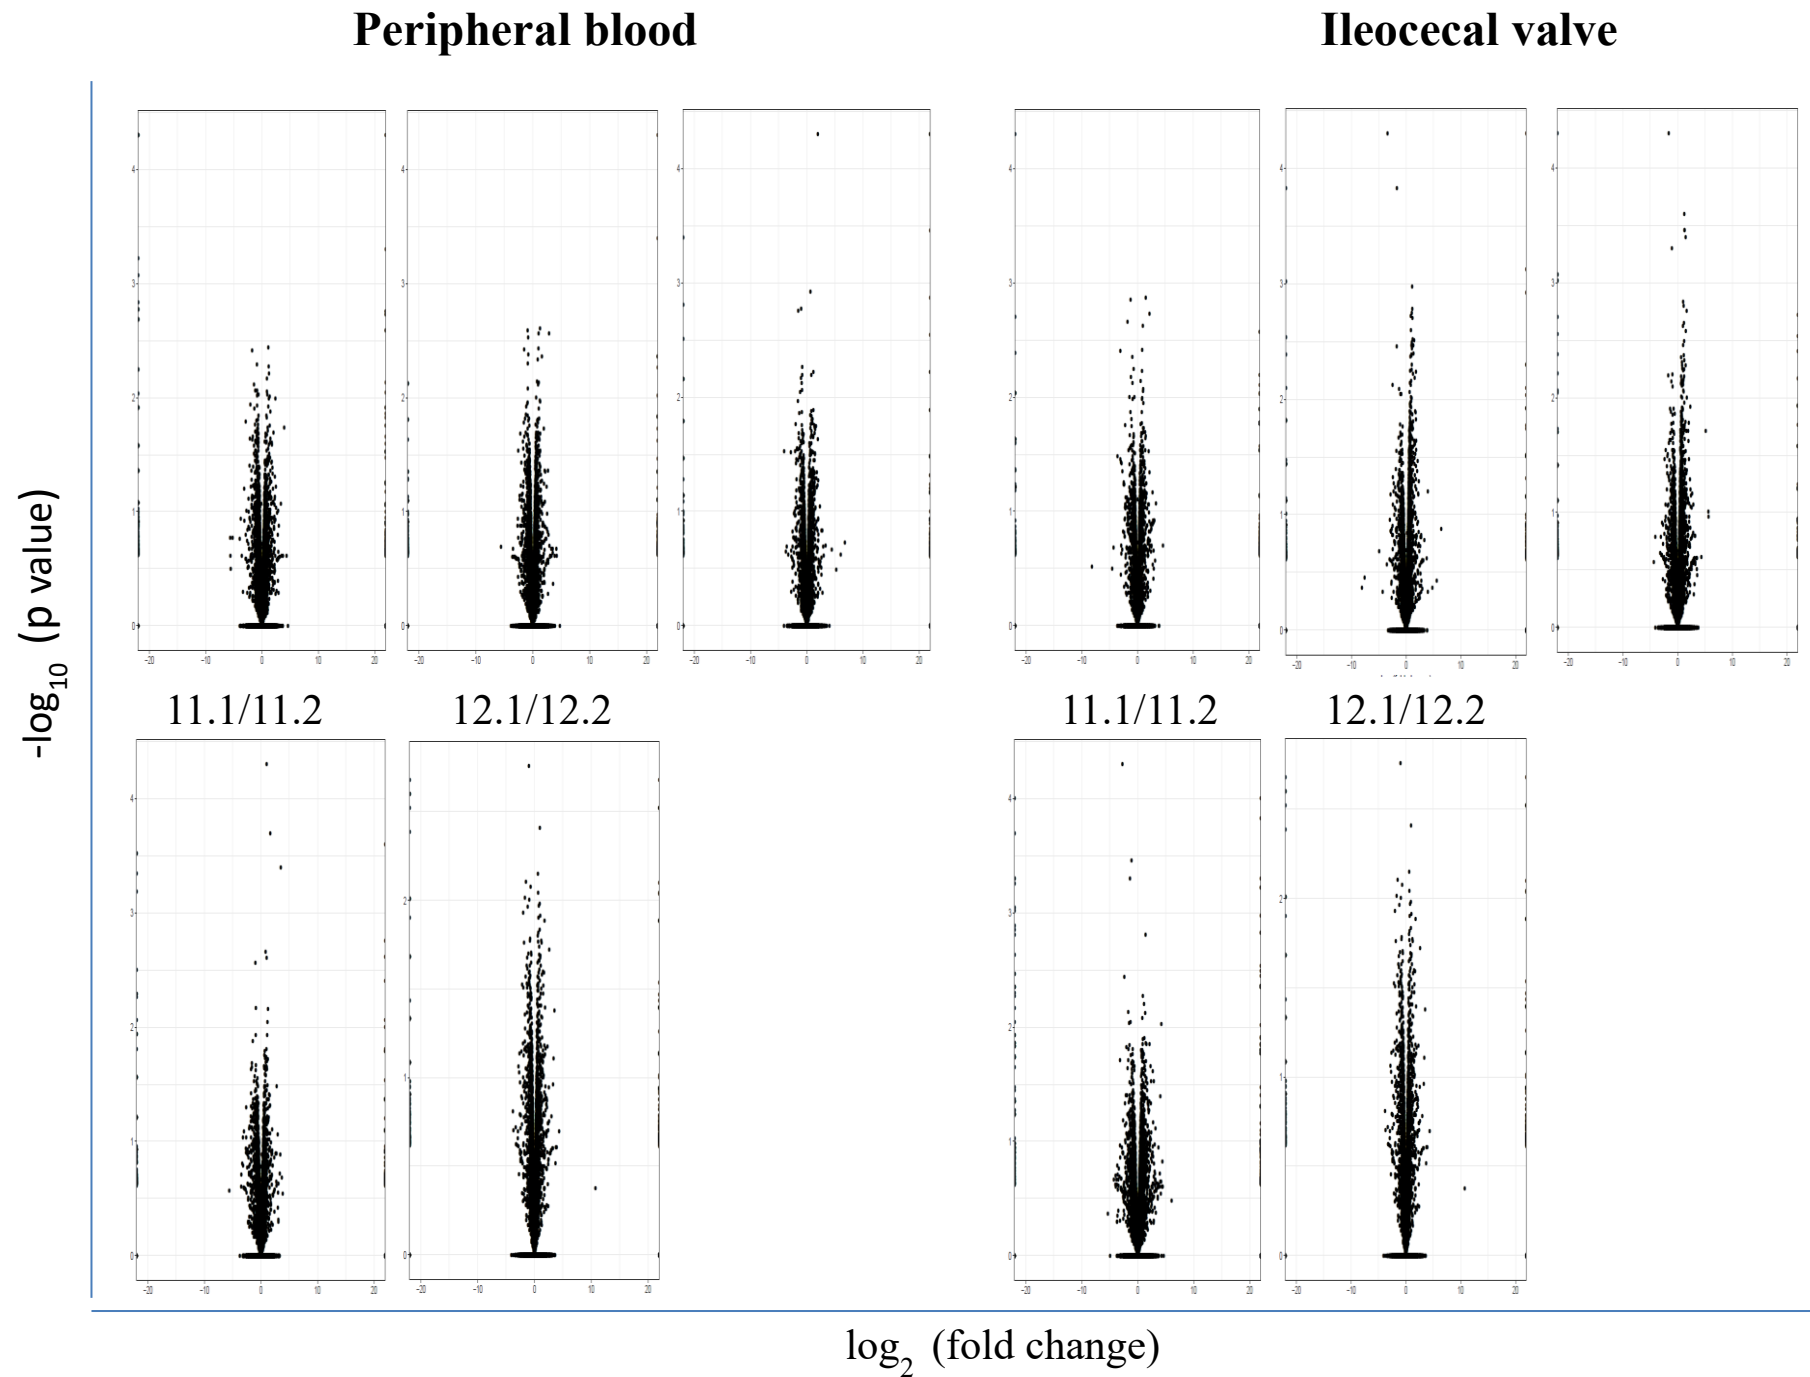

Supplement: 41598_2019_51328_MOESM1_ESM.pdf [file 41598_2019_51328_MOESM1_ESM.pdf]
